# Supplementary material
Source: HighWire-hosted journal article supplement (https://bmjopen.bmj.com/content/9/8/e030650)
Supplement: inline-supplementary-material-1 [file inline-supplementary-material-1.pdf]

**Appendices: Supplementary materials**

Perng et al., Fall and risk factors for veterans and nonveterans inpatients over the age of 65: 14 years of long-term data analysis

- Table S1. Abbreviation and ICD-9-CM / NHI order code
- Table S2. Factors of falls by using Cox proportional hazard regression in different model
- Table S3. Prevalence of osteoporosis in veterans and nonveterans who experienced falling
- Table S4. Analysis of veterans with mental disorders and urbanization
- Table S5. Risk factors of falls stratified by variables listed in the table based on the Cox regression analysis
- Table S6. Risk factors of recurrent falls by multivariable cox proportional hazard regression amongst veterans
- Table S7. Analysis between depression and chronic diseases
- Table S8. Comparison the medical utilization of falling between veterans and nonveterans

Table S1. Abbreviation and ICD-9-CM / NHI order code

| Variables                             | Abbreviation | ICD-9-CM / NHI order code |
|---------------------------------------|--------------|---------------------------|
| Events                                |              |                           |
| Falls                                 |              | 880-888                   |
| From the different level              |              | 880-884                   |
| On the same level                     |              | 885-886                   |
| Unspecified                           |              | 887-888                   |
| Comorbidities                         |              |                           |
| Mental disorder                       |              | 290-319                   |
| Eye disease                           |              | 360-379                   |
| Hypertension                          | HTN          | 401-405                   |
| Hyperlipidemia                        |              | 272                       |
| Atherosclerosis                       |              | 440                       |
| Chronic obstructive pulmonary disease | COPD         | 490-496                   |
| Ischemic heart disease                | IHD          | 410-414                   |
| Heart failure                         | HF           | 428                       |
| Cerebrovascular disease               | CD           | 430-438                   |
| Rheumatism                            | RA           | 725-729                   |
| Peptic ulcer disease                  | PUD          | 533                       |
| Liver disease                         |              | 571                       |
| Diabetes mellitus                     | DM           | 250                       |
| Hemiplegia                            |              | 342-344                   |
| Chronic kidney disease                | CKD          | 580-589                   |
| Cancer                                |              | 140-239                   |

Table S2. Factors of falls by using Cox proportional hazard regression in different model

| Model   | Variables                | Adjusted HR | 95% CI      | P-value |
|---------|--------------------------|-------------|-------------|---------|
| Model 1 | Falls                    | 1.252       | 1.234-1.270 | <0.001  |
| Model 2 | Falls                    |             |             |         |
|         | From the different level | 1.171       | 1.122-1.222 | <0.001  |
|         | On the same level        | 1.193       | 1.171-1.215 | <0.001  |
|         | Unspecified              | 1.451       | 1.410-1.493 | <0.001  |
| Model 3 | Single Fall              | 1.229       | 1.208-1.249 | <0.001  |
|         | Recurrent Falls          | 1.290       | 1.250-1.331 | <0.001  |

Abbreviations: HR=hazard ratio, CI=confidence interval, Adjusted HR: Adjusted for the variables listed in Table 2.

Table S3 Prevalence of osteoporosis in veterans and nonveterans who experienced falling

| Osteoporosis | Group            |               | Total         | P-value |
|--------------|------------------|---------------|---------------|---------|
|              | Non veterans (%) | Veterans (%)  |               |         |
| Without      | 521,699 (4.8)    | 33,747 (95.2) | 85,916 (94.9) | <0.001  |
| With         | 2,868 (5.2)      | 1,707 (4.8)   | 4,575 (5.1)   |         |
| Total        | 55,037 (100)     | 35,454 (100)  | 90,491 (100)  |         |

Table S4 Analysis of veterans with mental disorders and urbanization

| Mental disorder | Urbanization   |                 |               | Total          | P-value |
|-----------------|----------------|-----------------|---------------|----------------|---------|
|                 | Low (%)        | Midian (%)      | High (%)      |                |         |
| Without         | 46,337 (76.0)  | 195,596 (84.8)  | 70,274 (85.4) | 312,207 (83.5) | <0.001  |
| With            | 14,660 (24.0)  | 35,195 (15.2)   | 11,995 (14.6) | 61,850 (16.5)  |         |
| Total           | 60,997 (100.0) | 230,791 (100.0) | 82,269 (100)  | 374,057 (100)  |         |

Table S5. Risk factors of falls stratified by variables listed in the table based on the Cox regression analysis

| Group           |       | Veterans |       | Non Veterans |         |       | Adjusted | 95% CI      | P-value |
|-----------------|-------|----------|-------|--------------|---------|-------|----------|-------------|---------|
| Stratified      | Event | PYs      | Rate  | Event        | PYs     | Rate  | HR       |             |         |
| Mental disorder |       |          |       |              |         |       |          |             |         |
| Depression      | 2,551 | 105,775  | 2,412 | 2,250        | 115,801 | 1,943 | 1.366    | 1.283-1.454 | <0.001  |
| Anxiety         | 1,110 | 52,259   | 2,124 | 1,051        | 64,946  | 1,618 | 1.317    | 1.201-1.443 | <0.001  |
| EYE disorder    |       |          |       |              |         |       |          |             |         |
| Cataract        | 4,502 | 307,007  | 1,466 | 2,573        | 212,489 | 1,211 | 1.378    | 1.306-1.453 | <0.001  |
| Glaucoma        | 820   | 51,179   | 1,602 | 606          | 50,345  | 1,204 | 1.414    | 1.259-1.588 | <0.001  |

PYs = Person-years; Adjusted HR = Adjusted Hazard ratio: Adjusted for the variables listed in Table 2;  
Rate = per 100,000 PYs; CI = confidence interval.

Table S6. Risk factors of recurrent falls by multivariable cox proportional hazard regression amongst veterans

| Variables  | Adjusted HR | 95 % CI     | P-value |
|------------|-------------|-------------|---------|
| Depression | 1.938       | 1.793-2.094 | <0.001  |
| Cataract   | 1.322       | 1.237-1.412 | <0.001  |

HR = Hazard ratio CI = confidence interval, AHR: Adjusted Hazard ratio: Adjusted for the variables listed in Table 2; comorbidities are listed in Table S1.

Table S7. Analysis between depression and chronic diseases

| Variables         | Reference               | Adjusted HR | 95% CI      | P-value |
|-------------------|-------------------------|-------------|-------------|---------|
| Depression + HT   | No Depression + No HT   | 2.260       | 2.211-2.375 | <0.001  |
| Depression + COPD | No Depression + No COPD | 1.829       | 1.745-1.898 | <0.001  |
| Depression + CD   | No Depression + No CD   | 1.867       | 1.793-1.946 | <0.001  |
| Depression + RA   | No Depression + No RA   | 1.849       | 1.708-1.985 | <0.001  |

HR = Hazard ratio CI = confidence interval, Adjusted HR: Adjusted Hazard ratio: Adjusted for the variables listed in Table 2; comorbidities are listed in Table S1.

Table S8 Comparison the medical utilization of falling between veterans and nonveterans

| variables           | Total<br>Mean $\pm$ SD | Veterans<br>Mean $\pm$ SD | Nonveterans<br>Mean $\pm$ SD | P-value |
|---------------------|------------------------|---------------------------|------------------------------|---------|
| Length of day*      | 8.92 $\pm$ 8.72        | 9.13 $\pm$ 8.83           | 8.77 $\pm$ 8.65              | <0.001  |
| Medical cost(NT\$)* | 58,905 $\pm$ 77,292    | 58,997 $\pm$ 78,218       | 58,845 $\pm$ 76,690          | <0.773  |
| Death (%)           | 2,846 (3.25)           | 1,297 (3.7)               | 1,549 (2.8)                  | <0.001  |

Chi-square/Fisher exact test on category variables and \*t-test on continue variables.

SD: standard deviation
